# Supplementary material
Source: publisher figshare collection journal article supplement (https://sage.figshare.com/ndownloader/files/17682368)
Supplement: Supplementary file 1 [file 17682368]

Supplemental Fig. 1: Study flow diagram

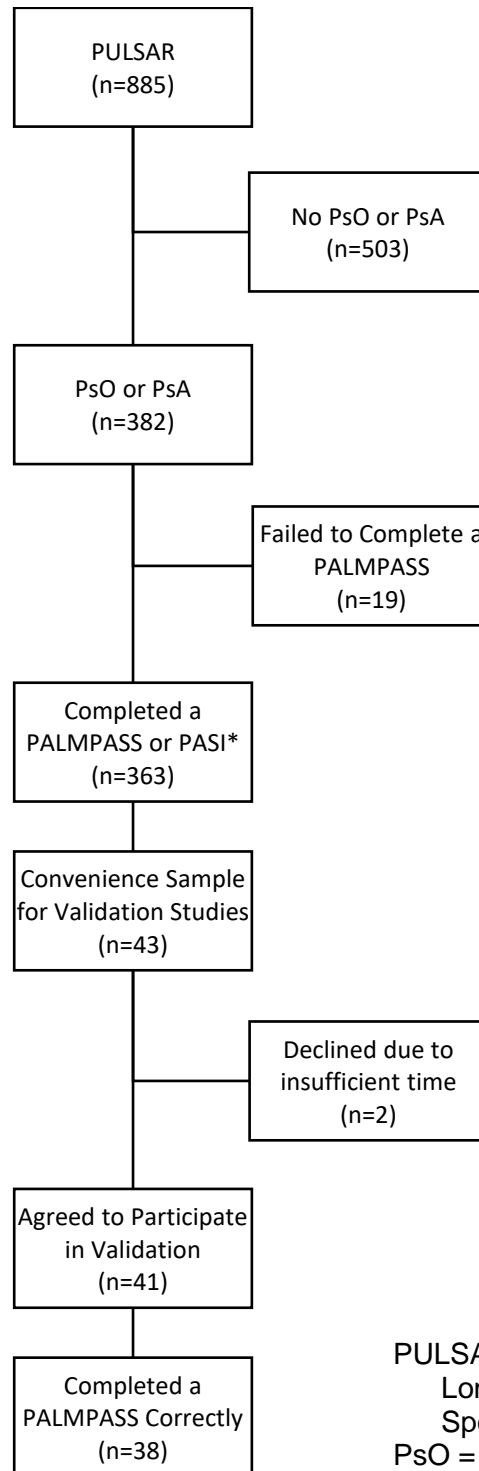

PULSAR = Program to Understand the Longterm outcomes in SpondyloARthritis registry  
PsO = psoriasis  
PsA = psoriatic arthritis  
PALMPASS = palm-referenced psoriasis area and severity score  
PASI = Psoriasis Area and Severity Index

\* Data used for regression analysis
